# Supplementary material
Source: PubMed Central journal article supplement (PMC5971589)
Supplement: AAC.00051-18_zac006187171s1.pdf [file AAC.00051-18_zac006187171s1.pdf]

## Supplementary Figures, Scheele et al.

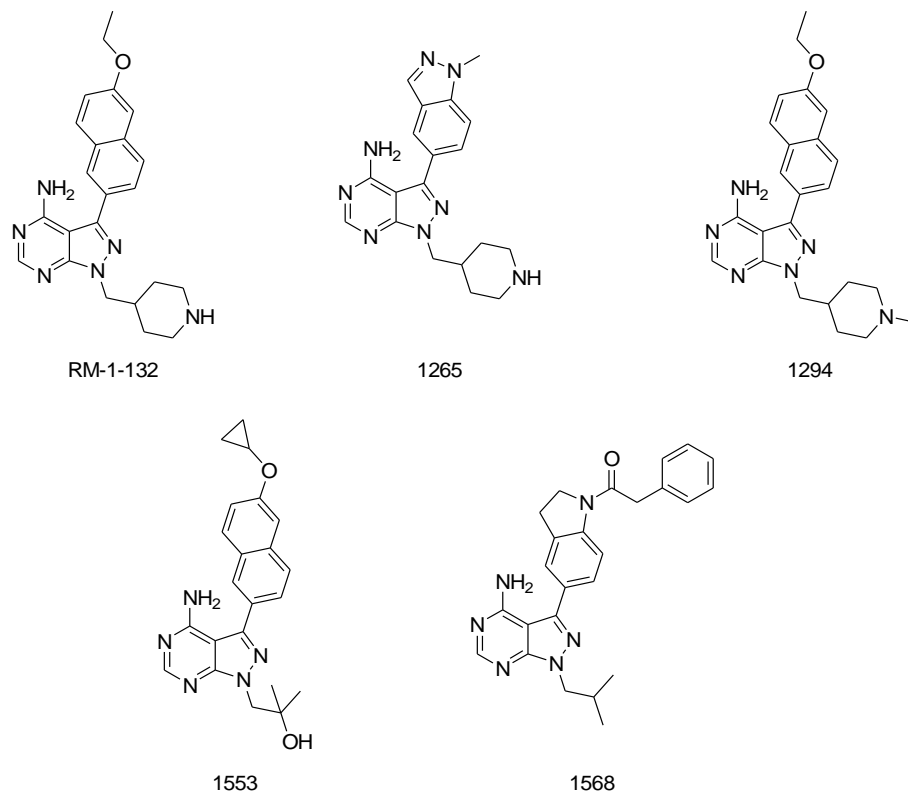

**Fig S1 . Structures of bumped kinase Inhibitors**

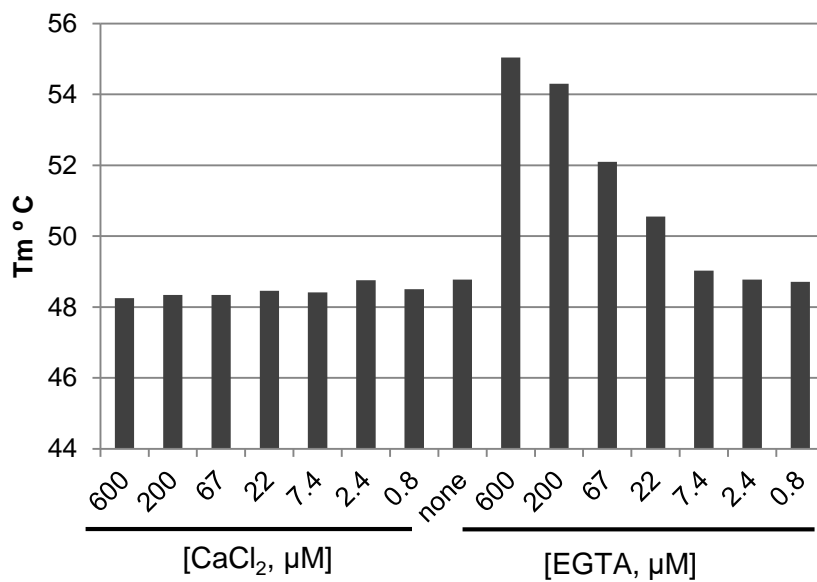

**Figure S2. Calcium chelation stabilizes purified CDPK1 in TSAs.** The addition of calcium to the TSA had no effect, while the addition of EGTA increased the  $T_m$ . The standard assay buffer ("none") contained no added calcium nor did it contain EGTA. However, it is possible that CDPK1 bound calcium in *E. coli* and/or that buffers contained trace amounts of calcium.

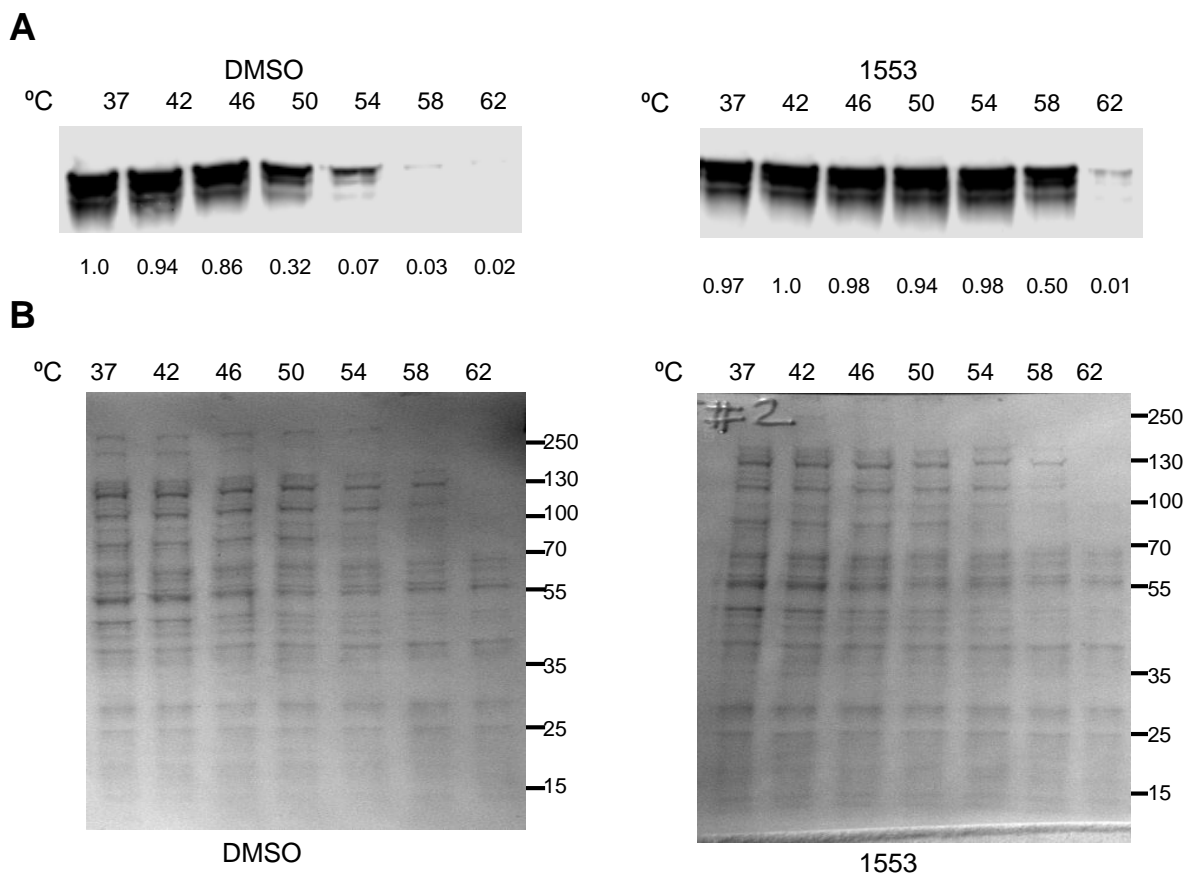

**Figure S3. Example of an L-CETSA assay of CDPK1 using BKI 1553 compared to vehicle alone (DMSO).** Following incubation at the indicated temperature, samples were centrifuged and the soluble material was loaded onto an SDS-PAGE gel and then blotted.

- A) Western blot using anti-CDPK1 followed by goat anti-rabbit IgG coupled to IRDye 800. Signal was revealed by scanning on the LICOR Odyssey. Below each lane, signal is quantified as compared to the highest signal in the series.
- B) Ponceau stained blot demonstrating that BKI 1553 does not cause non-specific protein aggregation.

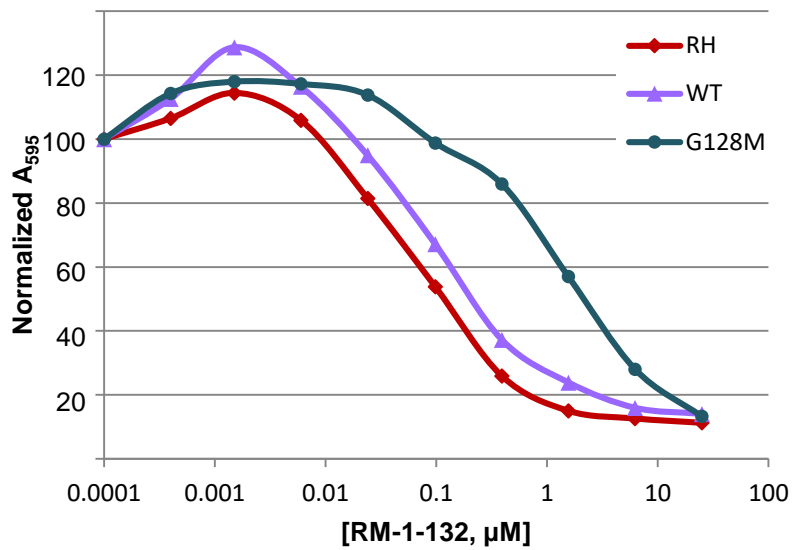

**Figure S4. Overexpression of CDPK1 with G128M gatekeeper mutation renders *T. gondii* resistant to BKI RM-1-132.** RH, the parental d11 clone used in RM1-132 selection. Experiments; WT and G128M, overexpression of epitope-tagged wild-type and gatekeeper mutant CDPK1 respectively. Compound was added prior to invasion of host cells and a  $\beta$ -galactosidase reporter was used to quantify the parasites at 44 hours using the colorimetric substrate chlorophenol red  $\beta$ -galactopyranose. The average of two independent experiments with triplicate data points is shown.

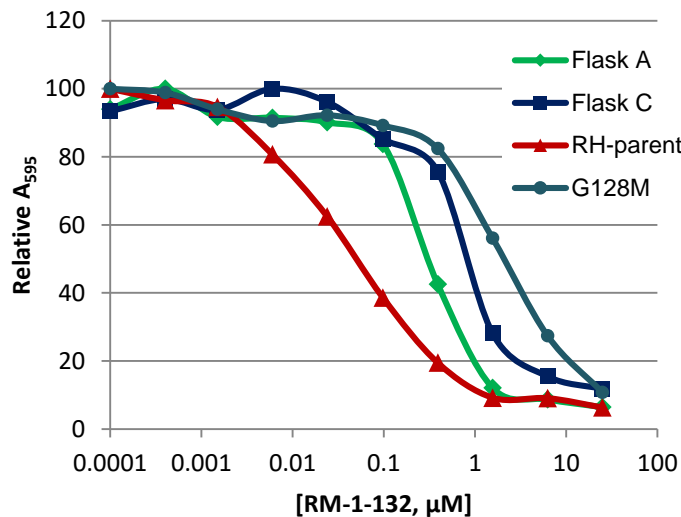

**Fig. S5. Invasion/growth assays for *T. gondii* selected with RM-1-132.** Uncloned lines were tested after 16 passages of selection.  $\text{EC}_{50}$ s calculated in this experiment are ( $\mu\text{M}$ ): Parent 0.04, G128M 2.25, flask A 0.32, flask C 0.72. The assay was conducted as described in Fig. S4.
